# Supplementary material for: Synthesis and characterization of thermally stable dyes with improved optical properties for dye-based LCD color filters
Source: Royal Society of Chemistry journal article supplement (doi:10.1039/c2nj20938a), 2012-01-01
Supplement: c2nj20938a.pdf [file c2nj20938a.pdf]

Supplementary Material (ESI) for NJC  
This journal is (c) The Royal Society of Chemistry 20XX

**Synthesis and Characterization of Thermally Stable Dyes  
with Improved Optical Properties for Dye-based LCD Color  
Filters**

**Supporting information**

**Jun Choi,<sup>‡a</sup> Se Hun Kim,<sup>‡a</sup> Woosung Lee,<sup>a</sup> Chun Yoon,<sup>b</sup> and Jae Pil Kim\*<sup>a</sup>**

<sup>a</sup> Department of Materials Science and Engineering, Seoul National University, Seoul 151-744, Korea. Fax: +82 2 880 7238; Tel: +82 2 880 7238; E-mail: jaepil@snu.ac.kr

<sup>b</sup> Department of Chemistry, Sejong University, 98 Gunja-dong, Gwangjin-gu, Seoul 143-747, Korea. Fax: +82 2 3408 3218; Tel: +82 2 3408 3218; E-mail: chuny@sejong.ac.kr

<sup>‡</sup> Both authors contributed equally to the research.

## *Synthesis*

### *3-(2,5-Bis(1,1-dimethylbutyl)-4-methoxyphenoxy)phthalonitrile (I).*

3-nitrophthalonitrile(1g, 5.77mmol) and 2,5-bis-(1,1-dimethylbutyl)-methoxyphenol(1.68g, 5.77mmol) were dissolved in dry DMF(30ml) and anhydrous K<sub>2</sub>CO<sub>3</sub>(1.06g, 7.66mmol) was added in portions during 4h. The mixture was stirred at 80 °C for 10h under nitrogen atmosphere. After filtering the reaction mixture, the residue was extracted with CH<sub>2</sub>Cl<sub>2</sub> and dried by rotary evaporation. After removal of the solvent, the crude product was purified on a silica gel column (CH<sub>2</sub>Cl<sub>2</sub>/hexane: 5/1) to afford the target compound as a light brown solid (1.98g, 82.22%). <sup>1</sup>H NMR (500MHz, CDCl<sub>3</sub>, 25 °C, TMS): δ = 7.44 (t, 1H), 7.32 (d, 1H), 6.89 (d, 1H), 6.76 (1H, s), 6.60(1H, s), 3.78 (s, 3H, -O-CH<sub>3</sub>), 1.64 (m, 2H), 1.54 (m, 2H), 1.20(d, 12H), 1.02 (m, 2H), 0.98 (m, 2H), 0.77 (t, 3H), 0.65 (t, 3H).

### *1(4)-Tetrakis(2,5-Bis(1,1-dimethylbutyl)-4-methoxyphenoxy)-phthalocyaninatozinc(II) (Ia).*

The solution of **1** (1.26g, 3mmol) in 1-pentanol (50ml) was refluxed under a nitrogen atmosphere and ZnCl<sub>2</sub> (0.41g, 3mmol) was added. After adding DBU (2.25ml, 15mmol), the solution was heated under reflux for 12h. After filtering the reaction mixture, the residue was purified on a silica gel column (CH<sub>2</sub>Cl<sub>2</sub>/MeOH: 50/1) to afford the target

compound as a bluish green solid (0.76g, 58.35%). MALDI-TOF MS : m/z 1740.07 (100%,  $[M+2K]^+$ ); Found: C, 74.36; H, 7.74; N, 6.37; O, 7.49%. Calc. for  $C_{106}H_{132}N_8O_8Zn$ : C, 74.38; H, 7.77; N, 6.55; O, 7.48%.

***1(4)-Tetrakis(2,5-Bis(1,1-dimethylbutyl)-4-methoxyphenoxy)-  
phthalocyaninatocopper(II) (1b).***

**1b** was synthesized following the same procedure for **1a** using **1** (1.26g, 3mmol), 1-pentanol (50ml),  $CuCl_2$  (0.40g, 3mmol), and DBU (2.25ml, 15mmol). The crude product was purified on a silica gel column ( $CH_2Cl_2$ /Hexane: 2/3) to afford the target compound as a dark bluish green solid (0.78g, 60.38%). MALDI-TOF MS : m/z 1737.86 (100%,  $[M+2K]^+$ ); Found: C, 74.66; H, 8.18; N, 6.10; O, 7.61%. Calc. for  $C_{106}H_{132}N_8O_8Zn$ : C, 74.46; H, 7.78; N, 6.55; O, 7.49%.

***1(4)-Tetrakis(2,5-Bis(1,1-dimethylbutyl)-4-methoxyphenoxy)-  
phthalocyaninatocobalt(II) (1c).***

**1c** was synthesized following the same procedure for **1a** using **1** (1.26g, 3mmol), 1-pentanol (50ml),  $CoCl_2$  (0.39g, 3mmol), and DBU (2.25ml, 15mmol). The crude product was purified on a silica gel column ( $CH_2Cl_2$ /Hexane: 1/1) to afford the target compound as a dark bluish green solid (0.68g, 51.71%). MALDI-TOF MS : m/z

1732.87 (100%,  $[M+2K]^+$ ); Found: C, 74.77; H, 7.45; N, 6.55; O, 7.78%. Calc. for  $C_{106}H_{132}N_8O_8Zn$ : C, 74.66; H, 7.80; N, 6.57; O, 7.51%.

***4-(2,5-Bis(1,1-dimethylbutyl)-4-methoxyphenoxy)phthalonitrile (2).***

4-nitrophthalonitrile(1g, 5.77mmol) and 2,5-bis-(1,1-dimethylbutyl)-methoxyphenol(1.68g, 5.77mmol) were dissolved in dry DMF(30ml) and anhydrous  $K_2CO_3$ (1.06g, 7.66mmol) was added in portions during 4h. The mixture was stirred at 80 °C for 8h under nitrogen atmosphere. After filtering the reaction mixture, the residue was extracted with  $CH_2Cl_2$  and dried by rotary evaporation. After removal of the solvent, the crude product was purified on a silica gel column ( $CHCl_3$ ) to afford the target compound as a light brown solid (2.13g, 88.47%).  $^1H$  NMR (500MHz,  $CDCl_3$ , 25 °C, TMS):  $\delta$  = 7.69 (d, 1H), 7.22 (s, 1H), 7.14 (d, 1H), 6.82 (s, 1H), 6.63(s, 1H), 3.08 (s, 3H, -O- $CH_3$ ), 1.71 (m, 2H), 1.56 (m, 2H), 1.26(d, 12H), 1.04 (m, 2H), 0.96 (m, 2H), 0.81 (t, 3H), 0.71 (t, 3H).

***2(3)-Tetrakis(2,5-Bis(1,1-dimethylbutyl)-4-methoxyphenoxy)-phthalocyaninatozinc(II) (2a).***

**2a** was synthesized following the same procedure for **1a** using **2** (1.26g, 3mmol), 1-pentanol (50ml),  $ZnCl_2$  (0.41g, 3mmol), and DBU (2.25ml, 15mmol). The crude product

was purified on a silica gel column (CH<sub>2</sub>Cl<sub>2</sub>) to afford the target compound as a bluish green solid (0.89g, 67.89%). MALDI-TOF MS : m/z 1738.44 (100%, [M+2K]<sup>+</sup>); Found: C, 74.61; H, 8.04; N, 6.59; O, 7.35%. Calc. for C<sub>106</sub>H<sub>132</sub>N<sub>8</sub>O<sub>8</sub>Zn: C, 74.38; H, 7.77; N, 6.55; O, 7.48%.

***2(3)-Tetrakis(2,5-Bis(1,1-dimethylbutyl)-4-methoxyphenoxy)-  
phthalocyaninatocopper(II) (2b).***

**2b** was synthesized following the same procedure for **1a** using **2** (1.26g, 3mmol), 1-pentanol (50ml), CuCl<sub>2</sub> (0.40g, 3mmol), and DBU (2.25ml, 15mmol). The crude product was purified on a silica gel column (CH<sub>2</sub>Cl<sub>2</sub>/Hexane: 1/1) to afford the target compound as a dark bluish green solid (0.85g, 65.57%). MALDI-TOF MS : m/z 1737.54 (100%, [M+2K]<sup>+</sup>); Found: C, 74.50; H, 7.43; N, 6.80; O, 7.19%. Calc. for C<sub>106</sub>H<sub>132</sub>N<sub>8</sub>O<sub>8</sub>Zn: C, 74.46; H, 7.78; N, 6.55; O, 7.49%.

***2(3)-Tetrakis(2,5-Bis(1,1-dimethylbutyl)-4-methoxyphenoxy)-  
phthalocyaninatocobalt(II) (2c).***

**2c** was synthesized following the same procedure for **1a** using **2** (1.26g, 3mmol), 1-pentanol (50ml), CoCl<sub>2</sub> (0.39g, 3mmol), and DBU (2.25ml, 15mmol). The crude product was purified on a silica gel column (CH<sub>2</sub>Cl<sub>2</sub>/Hexane: 1/1) to afford the target

compound as a dark bluish green solid (0.62g, 47.56%). MALDI-TOF MS : m/z 1732.52 (100%, [M+2K]<sup>+</sup>); Found: C, 74.63; H, 7.99; N, 6.41; O, 7.46%. Calc. for C<sub>106</sub>H<sub>132</sub>N<sub>8</sub>O<sub>8</sub>Zn: C, 74.66; H, 7.80; N, 6.57; O, 7.51%.

***N,N'-Bis(2,6-diisopropylphenyl)-5-phenylbenzoperylene-2,3,8,9-tetracarboxdiimides 3***

A deaerated mixture of EtOH (5.79ml), benzene (33.12ml), H<sub>2</sub>O (8.13ml) was added to a solid mixture of **5** (synthesized according to the previously reported procedures,<sup>9</sup> 1.0 g, 1.27 mmol), 1-phenylvinylboronicacid (0.68 g, 4.6 mmol), Pd(PPh<sub>3</sub>)<sub>4</sub> (66.57 mg, 5.0 mol%), and Na<sub>2</sub>CO<sub>3</sub> (1.2 g, 11.5 mmol) under nitrogen. The mixture was reacted at 80 °C for 120 h. The reaction was quenched by the addition of water. The mixture was extracted with dichloromethane several times. The combined organic layer was dried over anhydrous MgSO<sub>4</sub> and concentrated under reduced pressure to provide a crude solid. The crude solid was further purified by column chromatography on silica gel using dichloromethane as the eluent. The band containing a trace of compounds synthesized from tribrominated diimide could be separated firstly. Then, the second band containing yellow compound **3** was collected.

Yield 66.8%; Mp > 300 °C (decomp.). <sup>1</sup>H NMR(500MHz, CDCl<sub>3</sub>): δ = 1.21 (d, 24H), 2.84 (septet, 4H), 7.38 (dd, 4H), 7.52 (m, 2H), 7.61 (t, 1H), 7.67 (t, 2H), 7.77 (t, 2H), 8.81 (s, 1H), 9.22 (d, 2H), 9.49 (d, 2H), 9.56 (s, 1H), 9.63 (s, 1H); <sup>13</sup>C NMR(126MHz,

$\text{CDCl}_3$ ):  $\delta = 24.25, 24.32, 29.55, 29.92, 122.41, 122.60, 123.22, 123.62, 123.71, 124.30,$   
 $124.42, 124.49, 124.73, 124.88, 126.08, 128.02, 128.10, 128.93, 129.03, 129.31, 129.72,$   
 $129.86, 129.88, 130.00, 130.25, 130.75, 130.92, 130.96, 131.10, 133.50, 133.94, 134.29,$   
 $135.21, 138.91, 143.15, 145.91, 145.96, 164.17, 164.26, 164.35$ ; MALDI-TOF MS:  $m/z$   
 $811.09$  (100%,  $[\text{M} + \text{H}^+]$ ); Found: C, 83.12; H, 5.58; N, 3.42%. Calc. for  $\text{C}_{56}\text{H}_{46}\text{N}_2\text{O}_4$ : C,  
 $82.94$ ; H, 5.72; N, 3.45%.

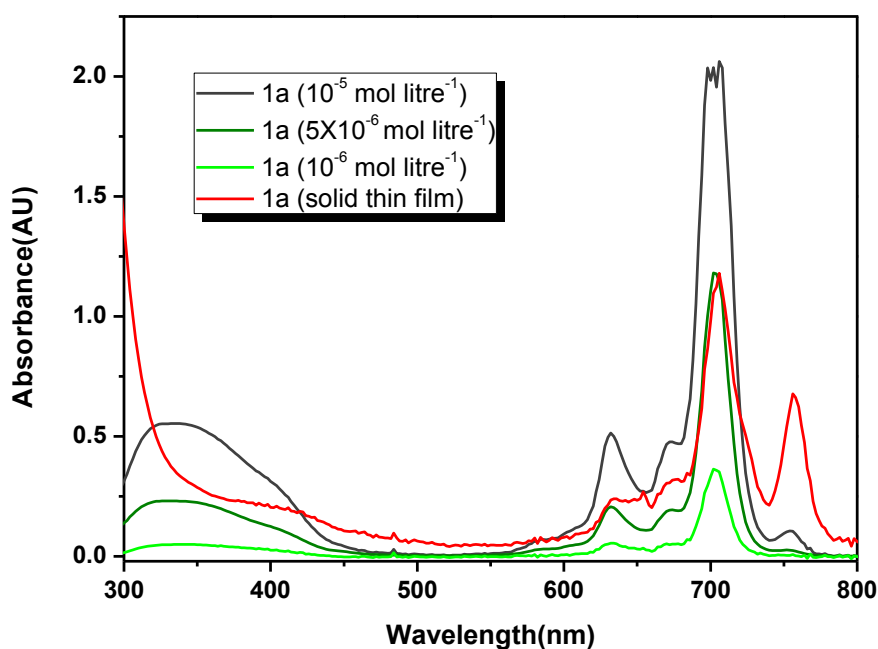

**Fig. 1S** The UV/Vis absorption spectra of the synthesized dye, **1a**, at different concentrations in PGMEA and in the solid thin films.

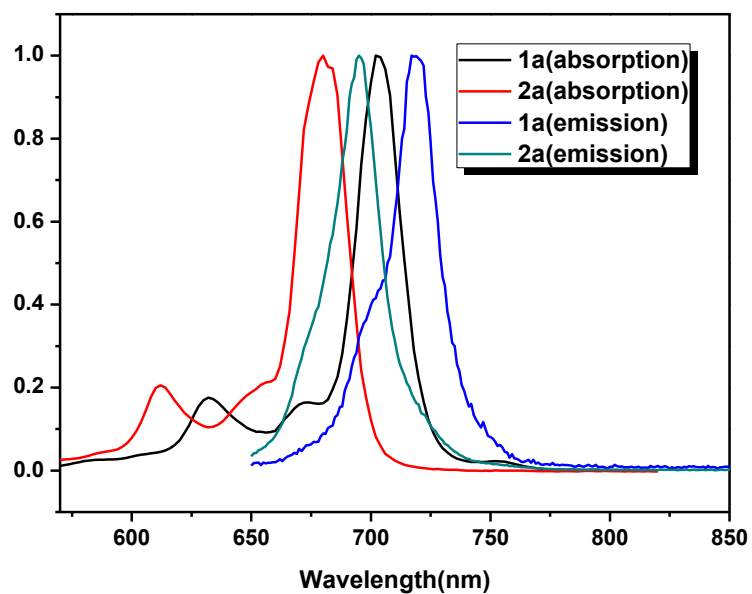

**Fig. 2S** Normalized absorption and fluorescence spectra of the synthesized dyes, **1a** and **2a**, in PGMEA ( $5 \times 10^{-6}$  mol litre<sup>-1</sup>).

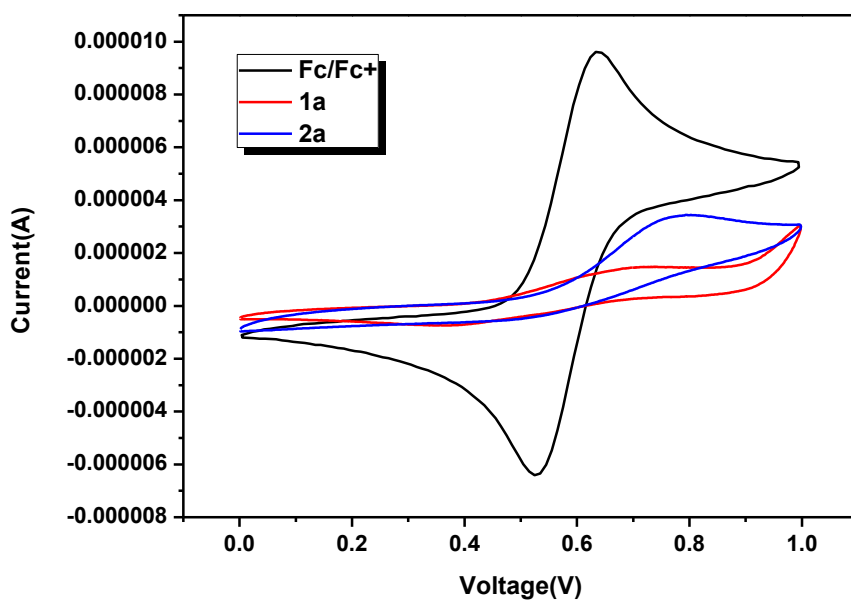



**Fig. 3S** Cyclic voltammetry curves of ferrocene/ferrocenium (Fc/Fc<sup>+</sup>), **1a** and **2a** in CH<sub>2</sub>Cl<sub>2</sub>.

| dye | absorption <sup>a</sup> | emission <sup>a</sup> | Oxidation potential data <sup>b</sup> |                        |                                     |
|-----|-------------------------|-----------------------|---------------------------------------|------------------------|-------------------------------------|
|     | $\lambda_{\max}$        | $\lambda_{\max}$      | $E_{\text{ox}}$<br>(vs NHE)           | $E_{0-0}$ <sup>c</sup> | $E_{\text{ox}}-E_{0-0}$<br>(vs NHE) |
| 1a  | 702nm                   | 717nm                 | 0.554V                                | 1.744V                 | -1.190V                             |
| 2a  | 680nm                   | 695nm                 | 0.644V                                | 1.802V                 | -1.158V                             |

**Table 1S** Optical and electrochemical properties of the synthesized dyes, **1a** and **2a**

<sup>a</sup> Measured in  $5 \times 10^{-6}$  mol litre<sup>-1</sup> of PGMEA solutions at room temperature.

<sup>b</sup> Measured in CH<sub>2</sub>Cl<sub>2</sub> containing 0.1 mol litre<sup>-1</sup> of tetrabutylammonium tetrafluoroborate (TBABF<sub>4</sub>) electrolyte (working electrode: glassy carbon; counter electrode: Pt; reference electrode: Ag/Ag<sup>+</sup>; calibrated with Fc/Fc<sup>+</sup> as an internal reference and converted to NHE by addition of 630mV).

<sup>c</sup> Estimated from intersection wavelengths between absorption and emission spectra.
